# Supplementary material
Source: PubMed Central journal article supplement (PMC4520162)
Supplement: ASN.2014040350_ASN2014040350SupplementaryData.pdf [file ASN.2014040350_ASN2014040350SupplementaryData.pdf]

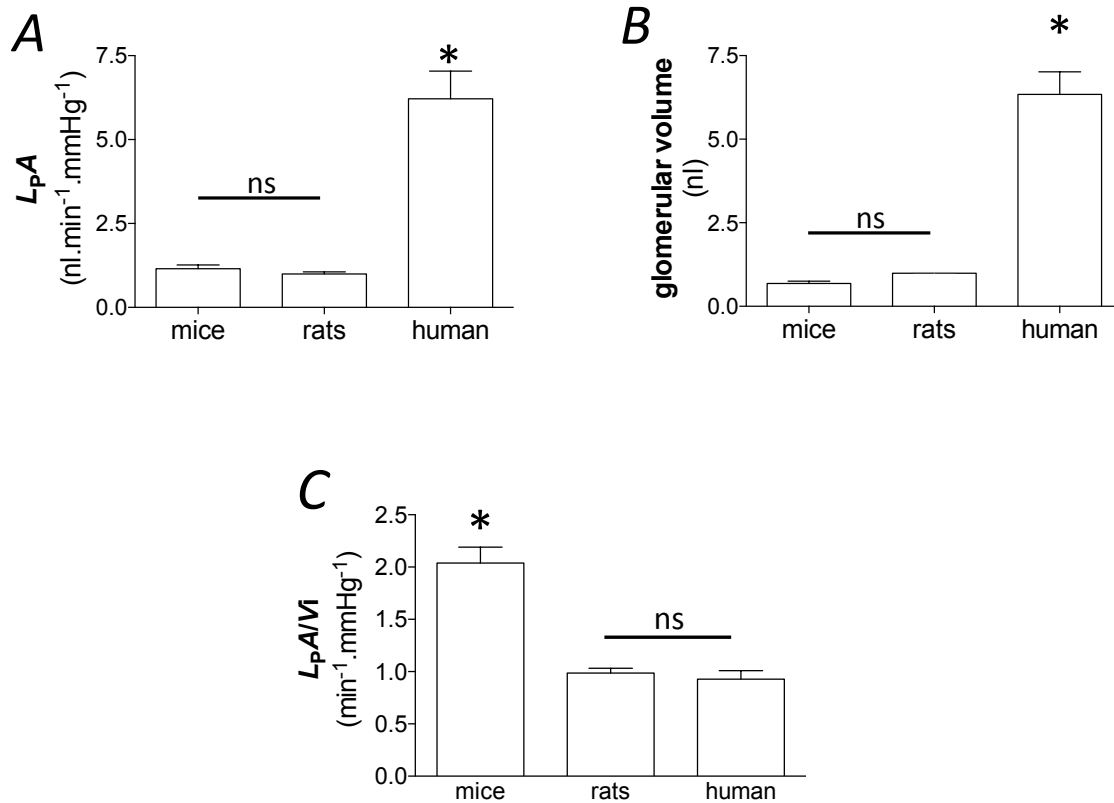

**Supplementary figure 1. Human glomerular ultrafiltration coefficient is high, on account of large surface area for fluid exchange.**

*A*: Glomerular water permeability (ultrafiltration coefficient:  $L_P A$ ) measured in individual glomeruli from healthy wild-type mice (67 glomeruli from 17 mice), healthy rats (134 glomeruli from 25 rats) and non-diabetic kidney donors (25 glomeruli from 3 donors). *B*: Glomerular volume determined in the same glomeruli. *C*: Volume-corrected ultrafiltration coefficient ( $L_P A/V_i$ ) calculated as the quotient of glomerular ultrafiltration coefficient ( $L_P A$ ) and glomerular volume ( $V_i$ ) for individual glomeruli.

\* $p < 0.05$ , one-way ANOVA vs other two species, <sup>ns</sup> $p > 0.05$ , one-way ANOVA for comparisons as indicated.

| Clinical details | Creatinine (μmol/L) | Proteinuria (g/L) | Histology                                                                                                                 | Molecular assays | Functional assay |
|------------------|---------------------|-------------------|---------------------------------------------------------------------------------------------------------------------------|------------------|------------------|
| Normal           | 62                  | Neg dipstick      | Normal                                                                                                                    | Y                | -                |
| Normal           | 60                  | Neg dipstick      | Normal                                                                                                                    | Y                | -                |
| Normal           | 65                  | Neg dipstick      | Normal                                                                                                                    | Y                | -                |
| Normal           | 184                 | Neg dipstick      | Normal                                                                                                                    | Y                | -                |
| Normal           | 85                  | Neg dipstick      | Normal                                                                                                                    | Y                | -                |
| Normal           | -                   | *                 | **                                                                                                                        | -                | Y                |
| Normal           | 70                  | *                 | **                                                                                                                        | -                | Y                |
| Normal           | 91                  | *                 | **                                                                                                                        | -                | Y                |
| Early DN         | 102                 | 1.1               | Nodular glomerulosclerosis, foci of interstitial fibrosis & tubular atrophy                                               | Y                | -                |
| Early DN         | 103                 | 1.54              | Mesangial expansion, diffuse glomerulosclerosis                                                                           | Y                | -                |
| Early DN         | 80                  | 0.5               | Early features of diabetic nephropathy                                                                                    | Y                | -                |
| Early DN         | 71                  | 0.44              | Mesangial expansion, diffuse glomerulosclerosis, slight tubular atrophy                                                   | Y                | -                |
| Early DN         | ***                 | ***               | Mesangial expansion, diffuse glomerulosclerosis                                                                           | Y                | -                |
| Early DN         | 86                  | *                 | **                                                                                                                        | -                | Y                |
| Early DN         | 89                  | 0.06              | **                                                                                                                        | -                | Y                |
| Early DN         | 91                  | 3                 | **                                                                                                                        | -                | Y                |
| Late DN          | 122                 | 3.14              | Mesangial expansion, nodular glomerulosclerosis, interstitial fibrosis, thickened GBM                                     | Y                | -                |
| Late DN          | 350                 | >10               | Diffuse nodular mesangial matrix expansion, advanced sclerosis, interstitial scarring, thickened GBM                      | Y                | -                |
| Late DN          | 144                 | 11                | Global sclerosis, Kimmelstiel-Wilson nodules, moderate tubular atrophy and interstitial fibrosis                          | Y                | -                |
| Late DN          | 390                 | >10               | Features of advanced diabetic nephropathy with moderate chronic damage                                                    | Y                | -                |
| Late DN          | 298                 | 13                | Global sclerosis, Kimmelstiel-Wilson nodules, marked chronic tubulointerstitial fibrosis                                  | Y                | -                |
| Late DN          | 127                 | 2.4               | Global sclerosis, nodular mesangial matrix expansion, widespread tubular atrophy and interstitial fibrosis, thickened GBM | Y                | -                |
| Late DN          | 269                 | 5.4               | Global mesangial sclerosis with nodularity, widespread tubular atrophy and interstitial fibrosis                          | Y                | -                |

**Supplementary Table 1. Human kidney sample details.**

\* urinary protein excretion not routinely collected in kidneys offered for transplantation, and therefore quantification not available.

\*\* physiology experiments preclude histology information from the same glomeruli

\*\*\* anonymised autopsy specimen: additional clinical details not available
